# Supplementary material for: Deepbinner: Demultiplexing barcoded Oxford Nanopore reads with deep convolutional neural networks
Source: PubMed Central journal article supplement (PMC6245502; doi:10.1371/journal.pcbi.1006583), 2018-11-20
Supplement: pcbi.1006583.s006.pdf [file pcbi.1006583.s006.pdf]

### Original signal

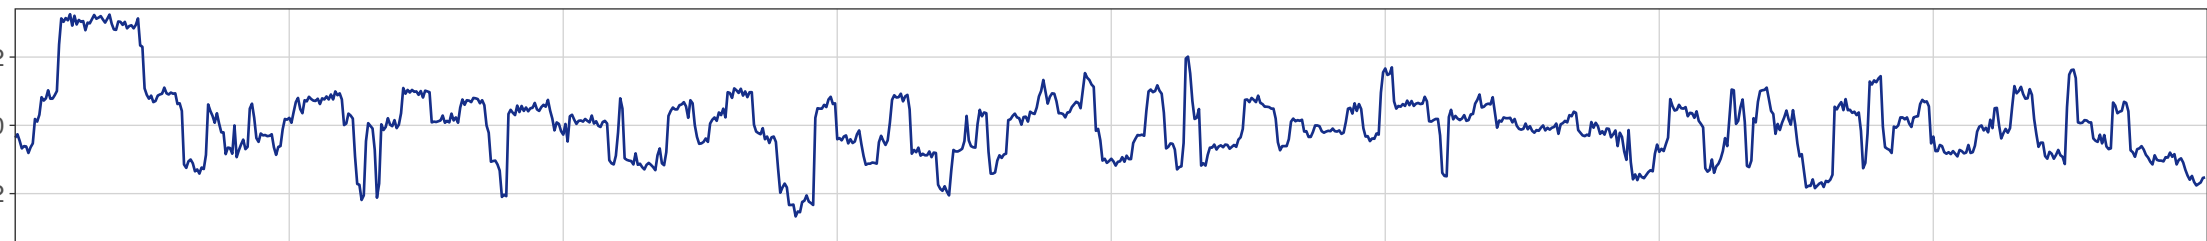

### Augmented signals

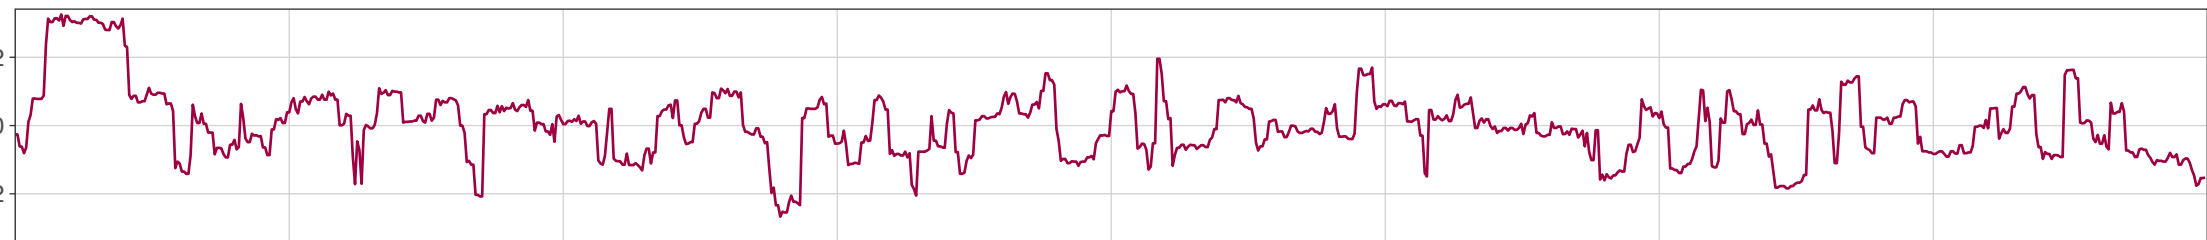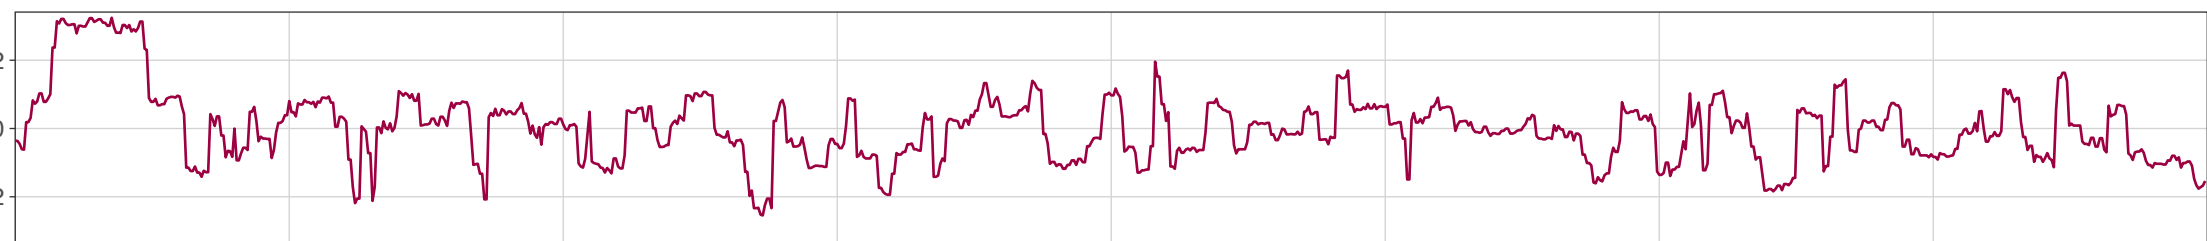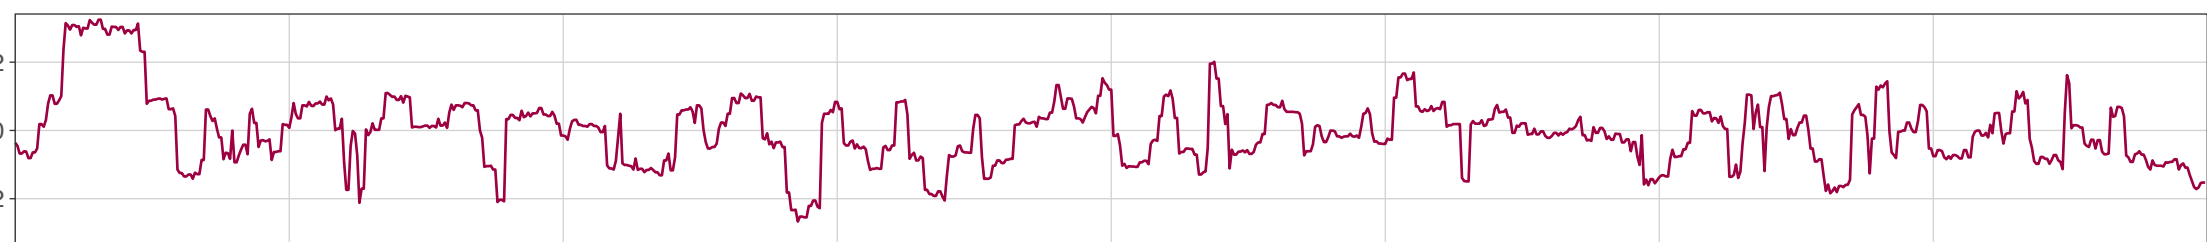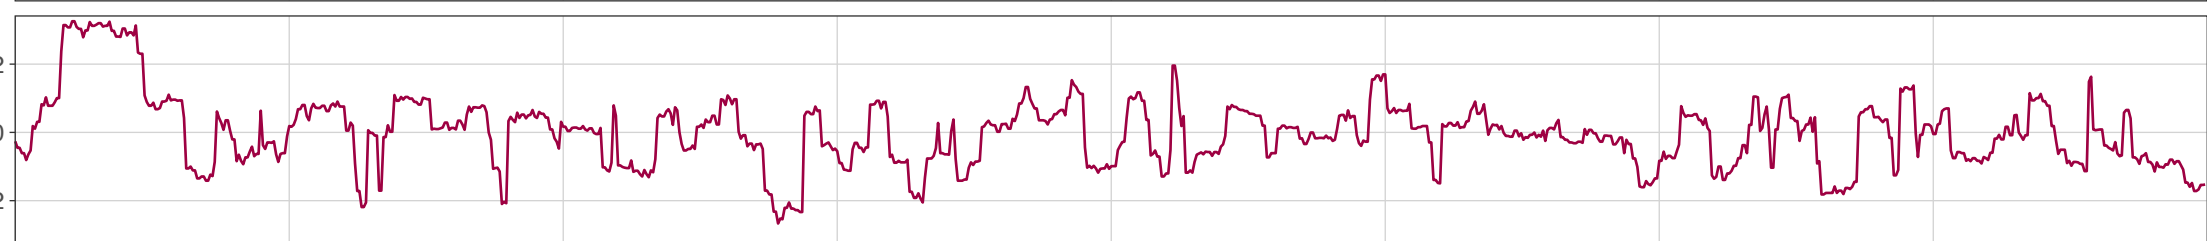

Time (samples)
