# Supplementary material for: Deepbinner: Demultiplexing barcoded Oxford Nanopore reads with deep convolutional neural networks
Source: PubMed Central journal article supplement (PMC6245502; doi:10.1371/journal.pcbi.1006583), 2018-11-20

### Read starts

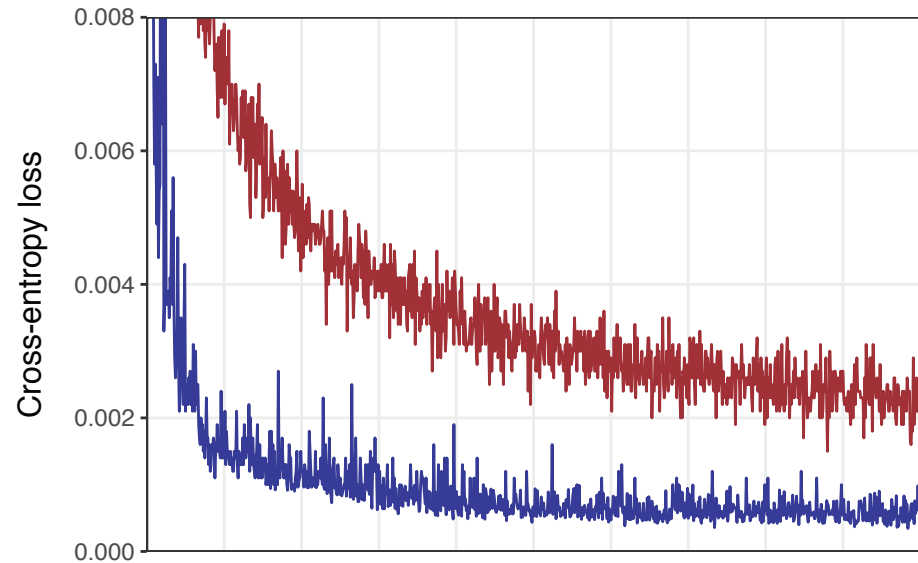

### Read ends

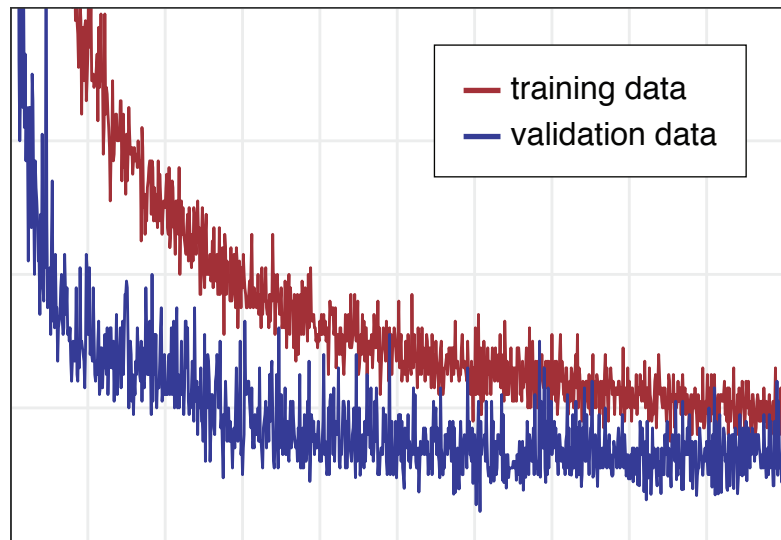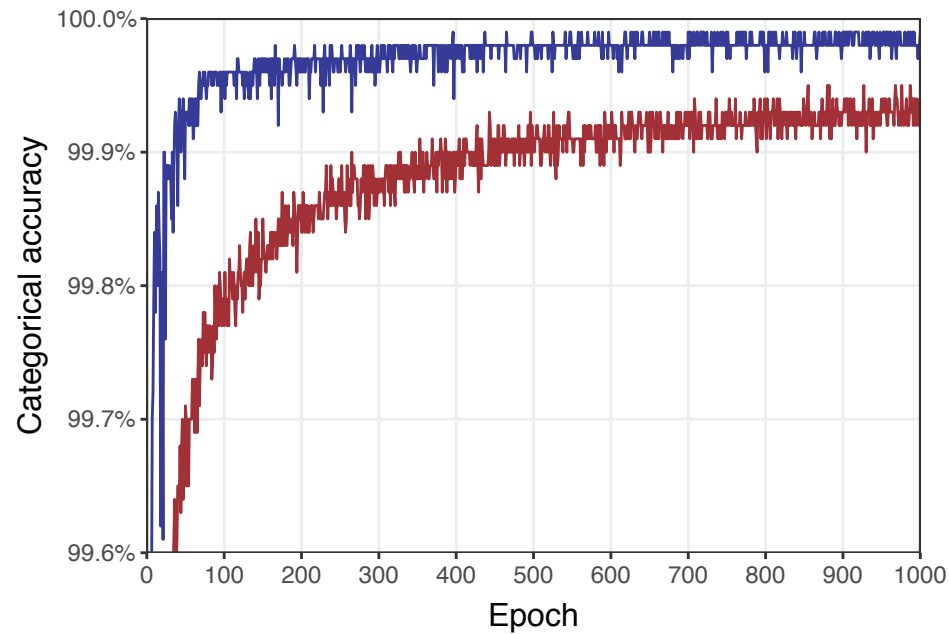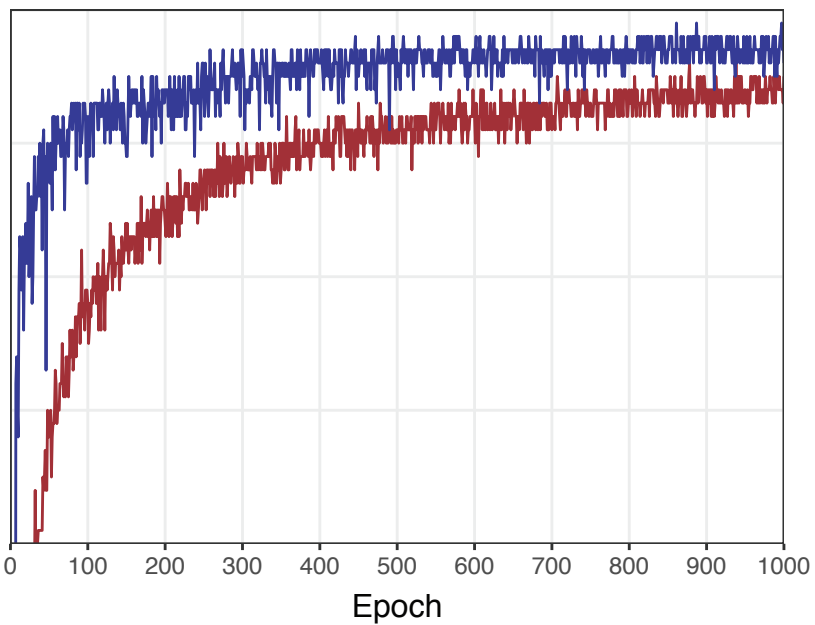

Supplement: pcbi.1006583.s007.pdf [file pcbi.1006583.s007.pdf]
