# Supplementary material for: Deepbinner: Demultiplexing barcoded Oxford Nanopore reads with deep convolutional neural networks
Source: PubMed Central journal article supplement (PMC6245502; doi:10.1371/journal.pcbi.1006583), 2018-11-20
Supplement: pcbi.1006583.s008.pdf [file pcbi.1006583.s008.pdf]

# Precision and recall vs q score

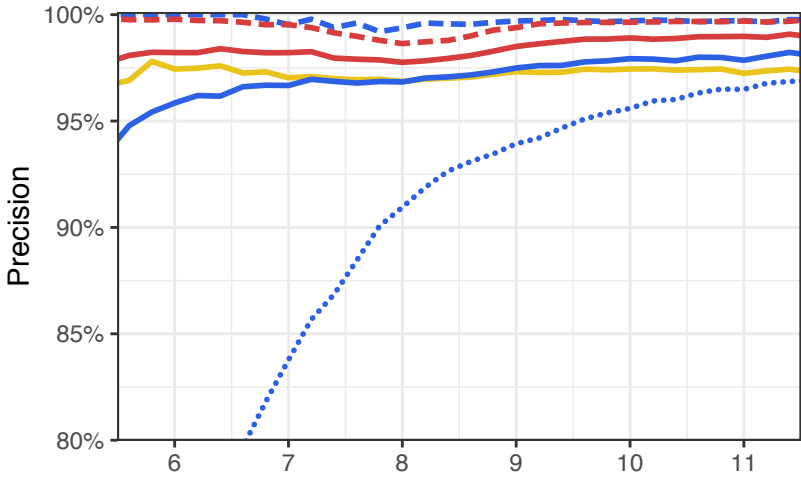

- Albacore
- Porechop (lenient)
- Porechop (default)
- Porechop (stringent)
- Deepbinner (default)
- Deepbinner (stringent)

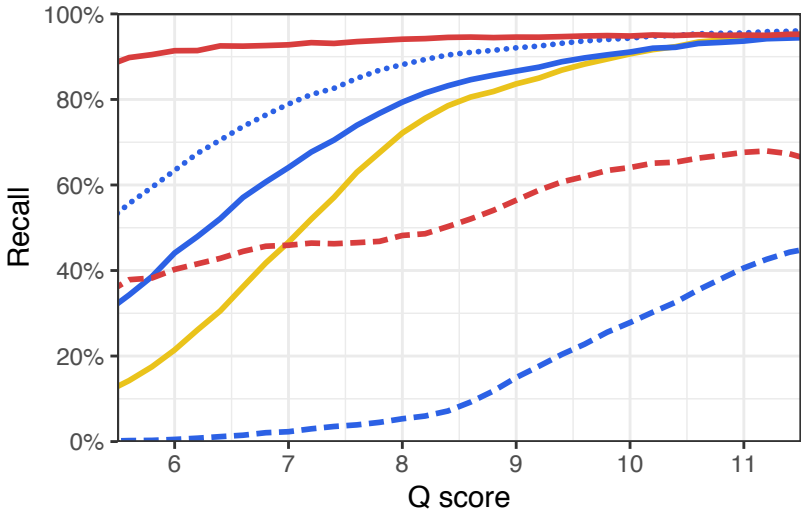

Q score
